# Supplementary material for: Quality improvement project to decrease unnecessary investigations in infants with bronchiolitis in Cork University Hospital
Source: HighWire-hosted journal article supplement (doi:10.1136/bmjoq-2021-001428), 2021-11-01
Supplement: bmjoq-2021-001428supp001_data_supplement.pdf [file bmjoq-2021-001428supp001_data_supplement.pdf]

## APPENDIX A

## BRONCHIOLITIS PATHWAY

TO BE USED IN ALL INFANTS: typically prodrome of coryza; <12MONTHS, PRESENTING WITH COUGHING, TACHYPNOEA, CHEST RECESSION AND WHEEZES/CREPITATIONS<sup>2</sup>

**ALWAYS LOOK FOR SEPSIS<sup>2,4</sup>; Uncontrollable fever; severe tachycardia out of proportion of the degree of respiratory distress; infants <2 months with fevers are septic until proven otherwise and need a septic workup and antibiotics**

|                                                                                                                                                                                                                                                                                                                                                                                                                                                                                                                                                                                                                                                                                                                                                                                                                                                                                                                      |                                                                                                                                                                                                                                                                                                                                                                                                                                                                                                                                                        |                                                                                                                                                                                                                                                                                                                                                                                                                                                                                                                                                                                                                                                                                                                                                                          |                                                                                                                                                                                                                                                                                                                                                                                                                                                                                                                                                                                                                                                                                                                                                                                                                                                                            |
|----------------------------------------------------------------------------------------------------------------------------------------------------------------------------------------------------------------------------------------------------------------------------------------------------------------------------------------------------------------------------------------------------------------------------------------------------------------------------------------------------------------------------------------------------------------------------------------------------------------------------------------------------------------------------------------------------------------------------------------------------------------------------------------------------------------------------------------------------------------------------------------------------------------------|--------------------------------------------------------------------------------------------------------------------------------------------------------------------------------------------------------------------------------------------------------------------------------------------------------------------------------------------------------------------------------------------------------------------------------------------------------------------------------------------------------------------------------------------------------|--------------------------------------------------------------------------------------------------------------------------------------------------------------------------------------------------------------------------------------------------------------------------------------------------------------------------------------------------------------------------------------------------------------------------------------------------------------------------------------------------------------------------------------------------------------------------------------------------------------------------------------------------------------------------------------------------------------------------------------------------------------------------|----------------------------------------------------------------------------------------------------------------------------------------------------------------------------------------------------------------------------------------------------------------------------------------------------------------------------------------------------------------------------------------------------------------------------------------------------------------------------------------------------------------------------------------------------------------------------------------------------------------------------------------------------------------------------------------------------------------------------------------------------------------------------------------------------------------------------------------------------------------------------|
| <p><b>SEVERE</b><br/>Any one of:</p> <ul style="list-style-type: none"> <li><input type="checkbox"/> Marked tachypnoea<sup>1</sup> <ul style="list-style-type: none"> <li>○ &lt;3mo: &gt;80/min</li> <li>○ 3-&lt;12mo: &gt;70/min</li> </ul> </li> <li><input type="checkbox"/> Lethargy or inconsolable<sup>1</sup></li> <li><input type="checkbox"/> Marked work of breathing: head bobbing, grunting, sternal recession<sup>1,2</sup></li> <li><input type="checkbox"/> Apnoea (frequent/ prolonged)<sup>2,4</sup></li> </ul>                                                                                                                                                                                                                                                                                                                                                                                     | <p>YES <input type="checkbox"/></p>                                                                                                                                                                                                                                                                                                                                                                                                                                   | <p><b>ADMIT<sup>4</sup></b></p> <ul style="list-style-type: none"> <li><input type="checkbox"/> <b>AVOID UNNECESSARY INVESTIGATIONS</b></li> <li><input type="checkbox"/> Administer NPO<sub>2</sub> to maintain pulse oximetry ≥92%</li> <li><input type="checkbox"/> Consider high flow NPO<sub>2</sub> **</li> <li><input type="checkbox"/> NG to decompress stomach</li> <li><input type="checkbox"/> Continuous NG feeds***</li> <li><input type="checkbox"/> IV line if signs of shock, or not tolerating NG fluids (vomiting/ worsening tachypnea or work of breathing)</li> <li><input type="checkbox"/> Inform ICU early: anticipate the possible need for additional respiratory support: CPAP/ intubation and transfer (PICU CRUMLIN:1800 222 378)</li> </ul> |                                                                                                                                                                                                                                                                                                                                                                                                                                                                                                                                                                                                                                                                                                                                                                                                                                                                            |
| <p>NO ↓</p>                                                                                                                                                                                                                                                                                                                                                                                                                                                                                                                                                                                                                                                                                                                                                                                                                                                                                                          | <p><b>MODERATE</b><br/>Any one of:</p> <ul style="list-style-type: none"> <li><input type="checkbox"/> Feeding &lt;50% of feeds despite smaller, more frequent feeds<sup>2</sup></li> <li><input type="checkbox"/> Irritability<sup>1</sup></li> <li><input type="checkbox"/> Moderate work of breathing: some intercostal recessions<sup>2</sup></li> <li><input type="checkbox"/> Risk factors for severe disease*<sup>4</sup></li> </ul>                                                                                                            | <p>YES <input type="checkbox"/></p>                                                                                                                                                                                                                                                                                                                                                                                                                                                                                                                                                                                                                                                    | <p><b>ADMIT/DISCHARGE</b></p> <ul style="list-style-type: none"> <li><input type="checkbox"/> <b>AVOID UNNECESSARY INVESTIGATIONS</b></li> <li><input type="checkbox"/> Minimal handling: keep in caregiver's arms if appropriate</li> <li><input type="checkbox"/> Avoid painful procedures</li> <li><input type="checkbox"/> Superficial nasal suction can be considered but should not be repeatedly attempted if no improvement seen<sup>1</sup></li> <li><input type="checkbox"/> NG feed if feeding &lt;50% feeds or signs of dehydration despite smaller more regular feeds<sup>2</sup></li> <li><input type="checkbox"/> Administer NPO<sub>2</sub> to maintain pulse oximetry ≥92%, if ineffective: will need high flow NPO<sub>2</sub><sup>4</sup></li> <li><input type="checkbox"/> Plan to discharge if meets discharge criteria below.<sup>4</sup></li> </ul> |
| <p>NO ↓</p>                                                                                                                                                                                                                                                                                                                                                                                                                                                                                                                                                                                                                                                                                                                                                                                                                                                                                                          | <p><b>MILD</b></p> <ul style="list-style-type: none"> <li><input type="checkbox"/> Alert<sup>1</sup></li> <li><input type="checkbox"/> No risk factors for severe disease**</li> <li><input type="checkbox"/> Pink on Room air<sup>3</sup></li> <li><input type="checkbox"/> Well hydrated<sup>2</sup></li> <li><input type="checkbox"/> Tolerating ≥ 50% of feeds<sup>2</sup></li> <li><input type="checkbox"/> Mild work of breathing<sup>1,3</sup></li> <li><input type="checkbox"/> Pulse oximetry ≥94% even while asleep<sup>1,2</sup></li> </ul> | <p>YES <input type="checkbox"/></p>                                                                                                                                                                                                                                                                                                                                                                                                                                                                                                                                                                                                                                                   | <p><b>DISCHARGE</b></p> <ul style="list-style-type: none"> <li><input type="checkbox"/> Can be managed at home<sup>4</sup>: see discharge checklist<sup>9</sup></li> <li><input type="checkbox"/> Parent info leaflet</li> <li><input type="checkbox"/> Antipyretics as needed</li> </ul>                                                                                                                                                                                                                                                                                                                                                                                                                                                                                                                                                                                  |
| <p>DATE: _____ SIGNED: _____ PATIENT MRN: _____</p>                                                                                                                                                                                                                                                                                                                                                                                                                                                                                                                                                                                                                                                                                                                                                                                                                                                                  |                                                                                                                                                                                                                                                                                                                                                                                                                                                                                                                                                        |                                                                                                                                                                                                                                                                                                                                                                                                                                                                                                                                                                                                                                                                                                                                                                          |                                                                                                                                                                                                                                                                                                                                                                                                                                                                                                                                                                                                                                                                                                                                                                                                                                                                            |
| <p>*Risk factors for severe disease:<sup>2</sup></p> <ul style="list-style-type: none"> <li>• Prematurity</li> <li>• Chronic lung disease</li> <li>• Heart disease</li> <li>• Immunodeficiency</li> <li>• Neuromuscular disease</li> <li>• Age &lt;6 weeks<sup>3</sup></li> </ul>                                                                                                                                                                                                                                                                                                                                                                                                                                                                                                                                                                                                                                    | <p>**Heated Humidified High flow nasal prong oxygen:<sup>3</sup></p> <ul style="list-style-type: none"> <li>• Consider in presence of hypoxia (&lt;92%) and a lack of response to nasal prong oxygen, or severe distress despite nasal prong oxygen</li> </ul>                                                                                                                                                                                                                                                                                         | <p>***Guide to NG rehydration:<sup>5,3</sup></p> <ul style="list-style-type: none"> <li>• Nasogastric rehydration is the route of choice as an alternative to oral rehydration.</li> <li>• Commence feeds at 2/3 of maintenance volume: continuous in severe cases and 2hrly bolus feeds in moderate</li> </ul>                                                                                                                                                                                                                                                                                                                                                                                                                                                          |                                                                                                                                                                                                                                                                                                                                                                                                                                                                                                                                                                                                                                                                                                                                                                                                                                                                            |
| <p><sup>9</sup>DISCHARGE CHECKLIST<sup>3</sup></p> <ul style="list-style-type: none"> <li><input type="checkbox"/> At least 2 vital signs measurements 4 hours apart in moderate cases.</li> <li><input type="checkbox"/> Pulse oximetry &gt;94% even while sleeping</li> <li><input type="checkbox"/> Able to feed &gt;50% of feeds. No signs of dehydration</li> <li><input type="checkbox"/> No risk factors for severe disease (see above)</li> <li><input type="checkbox"/> Excluded other differential diagnoses for acute wheeze: cardiac, foreign body, anaphylaxis</li> <li><input type="checkbox"/> Provide information leaflet; parents have reviewed leaflet and understand the expected disease progression and red flags, and <b>are able to return should the need arise</b></li> </ul> <p>&gt;&gt;Consider that babies with moderate distress &lt; day 3 of illness may still worsen up to day 3</p> |                                                                                                                                                                                                                                                                                                                                                                                                                                                                                                                                                        |                                                                                                                                                                                                                                                                                                                                                                                                                                                                                                                                                                                                                                                                                                                                                                          |                                                                                                                                                                                                                                                                                                                                                                                                                                                                                                                                                                                                                                                                                                                                                                                                                                                                            |
